# Supplementary material
Source: publisher figshare collection journal article supplement (https://tandf.figshare.com/articles/dataset/_/5693053)
Supplement: Supplementary file 2 [file 1]

**Table S2: Marketing profile of 13 analgesics products withdrawn only in one European country.**

| <b>Product</b> | <b>Launch year</b> | <b>Year withdrawn</b> | <b>Countries where marketed</b> |
|----------------|--------------------|-----------------------|---------------------------------|
| Antrafenine    | 1977               | 1984                  | France                          |
| Bendazac       | 1983               | 1993                  | Spain                           |
| Benzydamine    | 1967               | 1995                  | Germany, UK, USA                |
| Bezitramide    | 1961               | 2004                  | Belgium                         |
| Bucetin        | 1968               | 1986                  | Germany                         |
| Bufexamac*     | 1973               | 1990                  | Europe, USA                     |
| Clomacron      | 1966               | 1982                  | UK                              |
| Clometacin     | 1971               | 1990                  | France                          |
| Floctafenine   | 1976               | 1987                  | Belgium, Canada                 |
| Flosulide      | 1994               | 1996                  | Germany                         |
| Ibufenac       | 1961               | 1968                  | UK                              |
| Osmosin        | 1963               | 1983                  | UK, Japan, USA                  |
| Pifoxime       | 1975               | 1976                  | France                          |

\*Withdrawn initially only in France; subsequently withdrawn in the whole of Europe in 2010
