# Supplementary material
Source: publisher figshare collection journal article supplement (https://tandf.figshare.com/articles/dataset/_/5693053)
Supplement: Supplementary file 3 [file 1]

**Table S1: List of 16 withdrawn analgesics that were marketed in both Europe and the USA**

| Product                | Withdrawn in Europe | Reason for withdrawal in Europe           | Withdrawn in USA | Reason for withdrawal in the USA          | Action when the product was not withdrawn                        |
|------------------------|---------------------|-------------------------------------------|------------------|-------------------------------------------|------------------------------------------------------------------|
| Benoxaprofen           | Yes                 | Liver toxicity                            | Yes              | Liver toxicity                            | –                                                                |
| Bufexamac              | Yes                 | Allergic reactions                        | No               |                                           | New formulation marketed to reduce drug absorption               |
| Buprenorphine          | No                  |                                           | No               |                                           | Uses restricted [in both cases]                                  |
| Celecoxib              | Yes                 | Myocardial infarction, stroke             | No               |                                           | “Black box” warning†                                             |
| Co-proxamol            | Yes                 | Drug abuse                                | Yes              | Drug abuse                                | –                                                                |
| Diclofenac sodium*     | Yes                 | Carcinogenicity                           | No               |                                           | No change (evidence of carcinogenicity regarded as inconclusive) |
| Fenclozic acid         | Yes                 | Liver toxicity                            | Yes              | Liver toxicity                            | –                                                                |
| Fentanyl hydrochloride | Yes                 | Drug abuse                                | No               |                                           | Re-formulated                                                    |
| Ketorolac              | Yes                 | Gastrointestinal haemorrhage              | No               |                                           | “Black box” warning‡                                             |
| Oxyphenbutazone        | Yes                 | Bone marrow suppression                   | Yes              | Bone marrow suppression                   | –                                                                |
| Pirprofen              | Yes                 | Liver toxicity                            | Yes              | Liver toxicity                            | –                                                                |
| Propyphenazone         | Yes                 | Lyell's syndrome; bone marrow suppression | Yes              | Lyell's syndrome; bone marrow suppression | –                                                                |
| Rofecoxib              | Yes                 | Myocardial infarction                     | Yes              | Myocardial infarction                     | –                                                                |
| Suprofen               | Yes                 | Renal toxicity                            | Yes              | Diminished sales                          | –                                                                |
| Valdecoxib             | Yes                 | Cardiovascular and skin reactions         | Yes              | Cardiovascular and skin reactions         | –                                                                |
| Zomepirac              | Yes                 | Anaphylaxis                               | Yes              | Anaphylaxis                               | –                                                                |

\*Refused registration because carcinogenicity testing in rats was inconclusive and involved the use of only one rodent species

†Consider alternative therapy; use lowest effective dose if appropriate (<http://www.fda.gov/NewsEvents/Newsroom/PressAnnouncements/2004/ucm108384.htm>)

‡Contraindications: peptic ulcer, renal impairment, bleeding diathesis, following heart surgery ([http://www.accessdata.fda.gov/drugsatfda\\_docs/label/2007/019645s016lbl.pdf](http://www.accessdata.fda.gov/drugsatfda_docs/label/2007/019645s016lbl.pdf))
