# Supplementary material
Source: publisher figshare collection journal article supplement (https://tandf.figshare.com/articles/dataset/_/5693053)
Supplement: Supplementary file 4 [file 1]

## **Web Appendix 1: Search lists\*\* of accessed sources used to identify analgesic medicinal products withdrawn from the market because of adverse drug reactions.**

**The United Nations (UN) Consolidated List of Products whose consumption and/or sale have been banned, withdrawn, severely restricted, or not approved by governments:** Issue 6 (pgs. 5-197); Issue 8 (pgs. 30-264); Issue 12 (pgs. 31-203); and Issue 14 (pgs. 3-26)

### **W.H.O. Drug Information: Regulatory Matters Section**

2017: Vol. 31, No. 1

2016: Vol. 30, Nos. 1-4

2015: Vol. 29, Nos. 1-4

2014: Vol. 28, Nos. 1-4

2013: Vol. 27, Nos. 1-4

2012: Vol. 26, Nos. 1-4

2011: Vol. 25, Nos. 1-4

2010: Vol. 24, Nos. 1-4

2009: Vol. 23, Nos. 1-4

2008: Vol. 22, Nos. 1-4

2007: Vol. 21, Nos. 1-4

2006: Vol. 20, Nos. 1-4

2005: Vol. 19, Nos. 1-4

2004: Vol. 18, Nos. 1-4

2003: Vol. 17, Nos. 1-4

2002: Vol. 16, Nos. 1-2

2001: Vol. 15, Nos. 1-4

2000: Vol. 14, Nos. 1-4

1999: Vol. 13, Nos. 1-4

1998: Vol. 12, Nos. 1-4

1997: Vol. 11, Nos. 1-4

1996: Vol. 10, Nos. 1-4

1995: Vol. 9, Nos. 1-4

1994: Vol. 8, Nos. 1-4

1993: Vol. 7, Nos. 1-2

1992: Vol. 6, Nos. 1-4

1991: Vol. 5, Nos. 1-3

1990: Vol. 4, Nos. 1-4  
1989: Vol. 3, Nos. 1-4  
1988: Vol. 2, Nos. 1-4  
1987: Vol. 1, Nos. 1-3

### **W.H.O. Pharmaceuticals Newsletters: Regulatory Matters Section**

2017: Newsletter No. 1  
2016: Newsletter Nos. 1-6  
2015: Newsletter Nos. 1-6  
2014: Newsletter Nos. 1-6  
2013: Newsletter Nos. 1-6  
2012: Newsletter Nos. 1-6  
2011: Newsletter Nos. 1-6  
2010: Newsletter Nos. 1-6  
2009: Newsletter Nos. 1-5  
2008: Newsletter Nos. 1-6  
2007: Newsletter Nos. 1-6  
2006: Newsletter Nos. 1-6  
2005: Newsletter Nos. 1-5  
2004: Newsletter Nos. 1-6  
2003: Newsletter Nos. 1-5  
2002: Newsletter Nos. 1-4  
2001: Newsletter Nos. 1-3  
2000: Newsletter Nos. 1-4  
1999: Newsletter Nos. 1-12  
1998: Newsletter Nos. 1-12  
1997: Newsletter Nos. 1-12

### **European Medicines Agency (EMA)**

Find Medicine > Human Medicines > Browse by therapeutic area > Diseases > Symptoms and general pathology > Signs and Symptoms > Pain > “Include: withdrawn post-approval, suspended”

Find Medicine > Human Medicines > Referrals > Browse by topic > Safety issues > “Include: Opinion provided by Committee for Medicinal Products for Human Use, European Commission final decision”

### **US Food and Drug Administration (FDA)**

Home > Safety > Recalls, Market Withdrawals, & Safety Alerts > Archive for Recalls, Market Withdrawals & Safety Alerts

**The UK Medicines and Healthcare products Regulatory Agency (MHRA)**

Home > Drug safety update > Therapeutic area > Pain management and Palliation

**Stephens' Detection of New Adverse Drug Reactions, 5th edition, 2004** (pgs. 667-702)

**Pharmaceutical Manufacturing Manual, 3rd edition, 2006**

**The Merck Index, 15th edition, 2013**

**Meyler's Side Effects of Psychiatric Drugs 1st edition, 2009**

**Meyler's Side Effects of Cardiovascular Drugs 1st edition, 2009**

**PubMed/Medline and Embase search strategy**

“[Analgesic drug name]” AND “toxicity”

“[Analgesic drug name]” AND “adverse”

“[Analgesic drug name]” AND “side effect”

“[Analgesic drug name]” AND “poison”

“[Analgesic drug name]” AND “fatal\*”

“[Analgesic drug name]” AND “fatality”

“[Analgesic drug name]” AND “death”

“[Analgesic drug name]” AND “withdrawal”

“[Analgesic drug name]” AND “withdrawn”

“[Analgesic drug name]” AND “recall”

“[Analgesic drug name]” AND “voluntary recall”

“[Analgesic drug name]” AND “banned”

“[Analgesic drug name]” AND “prohibited”

“[Analgesic drug name]” AND “remov\*”

“[Analgesic drug name]” AND “discontinued”

“[Analgesic drug name]” AND “refus\*”

[Sort by Publication date]

### **Google Scholar search strategy**

Find articles with all of the words [analgesic drug name] > with the exact phrase [adverse or toxic or side effect or fatal or death or withdrawn or withdrawal or recall or banned or prohibited or discontinued or suspended] > Return articles dated between 1950-2016

### **Clinicaltrials.gov**

Clinicaltrials.gov/beta > Advanced search > Other Terms > Pain > Include:” Suspended”, “Terminated”, “Withdrawn”, “No longer available”

\*\*These sources were also used to document data on launch year, year of first adverse reaction report, year of first withdrawal, country or countries of withdrawal, and the mechanism through which the adverse reaction occurred.
