# Supplementary material
Source: publisher figshare collection journal article supplement (https://tandf.figshare.com/articles/dataset/_/5693053)

**Figure S1:** Interval between launch year and first withdrawals of analgesic medicines.

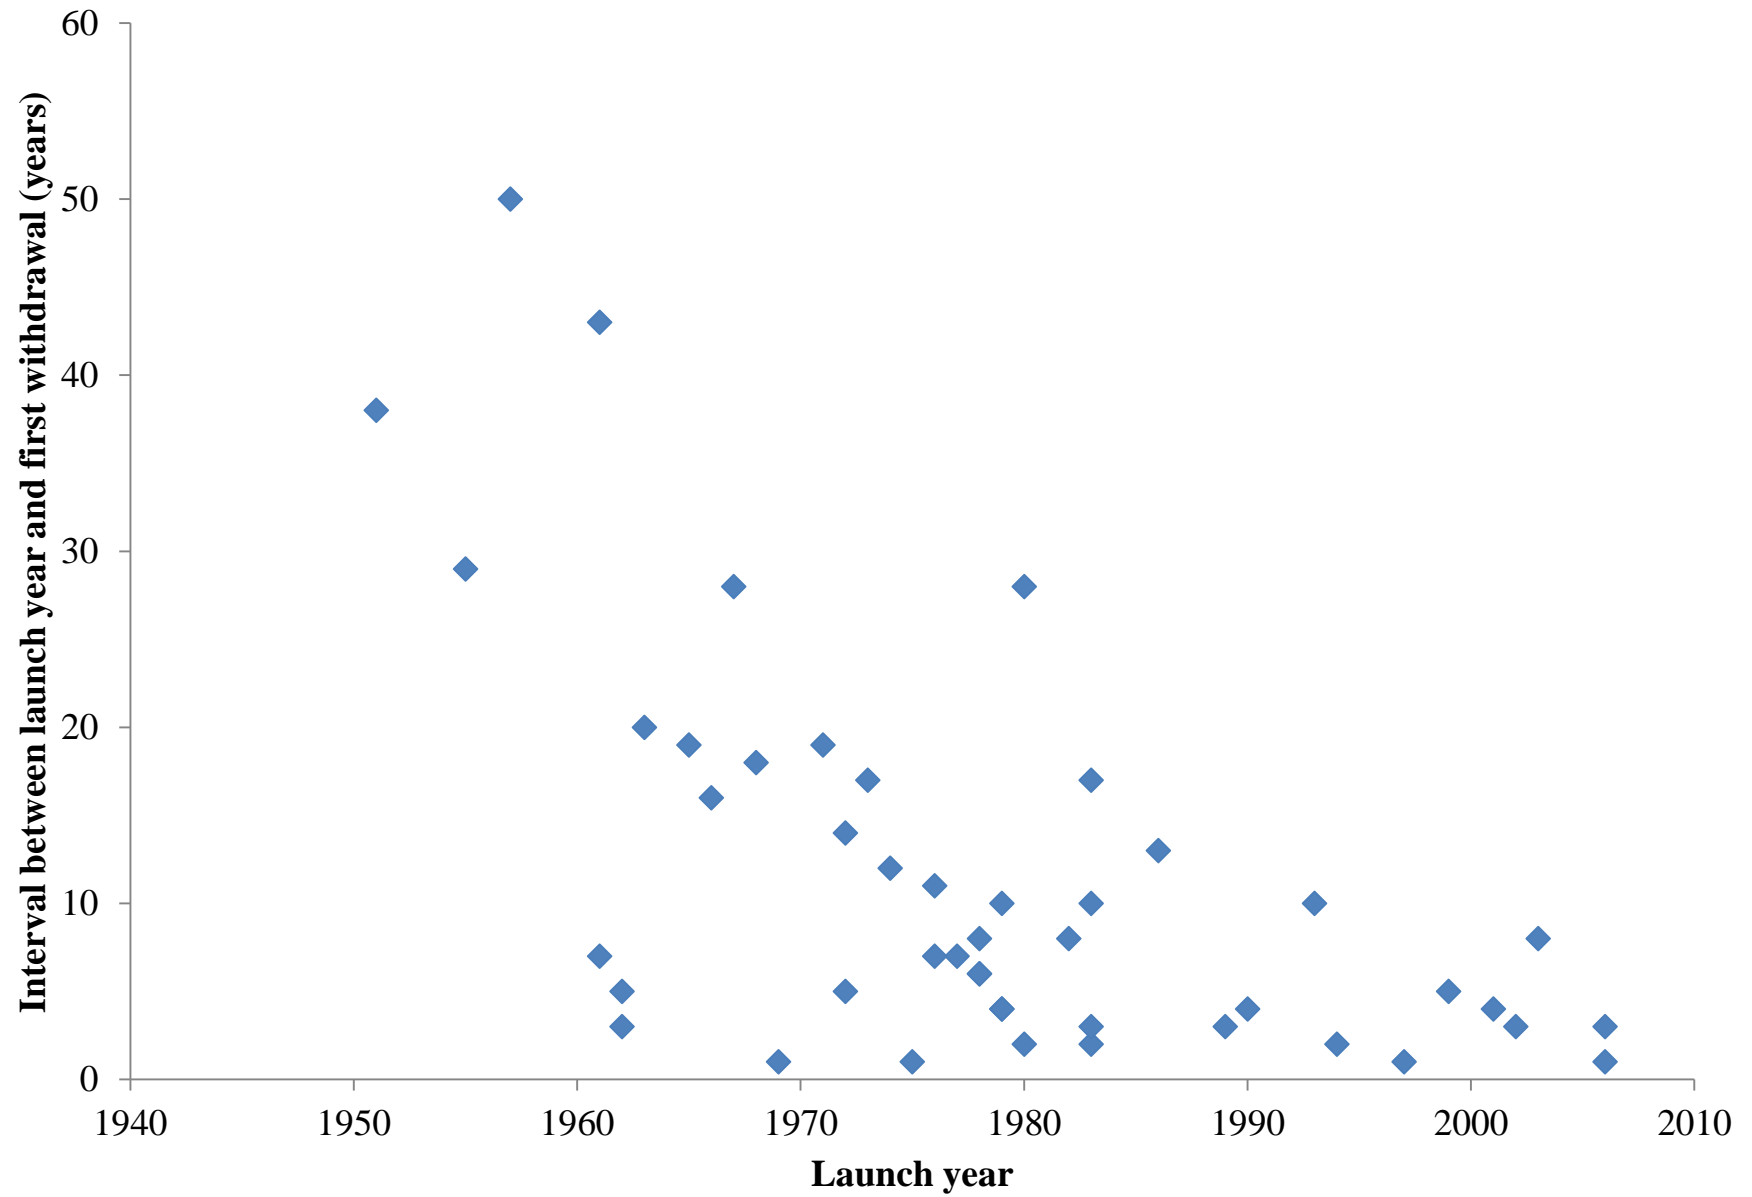

Supplement: Supplementary file 1 [file 1]
